# Supplementary material for: Origin of mitochondrial DNA diversity of domestic yaks
Source: PubMed Central journal article supplement (PMC1626082; doi:10.1186/1471-2148-6-73), 2006-09-22

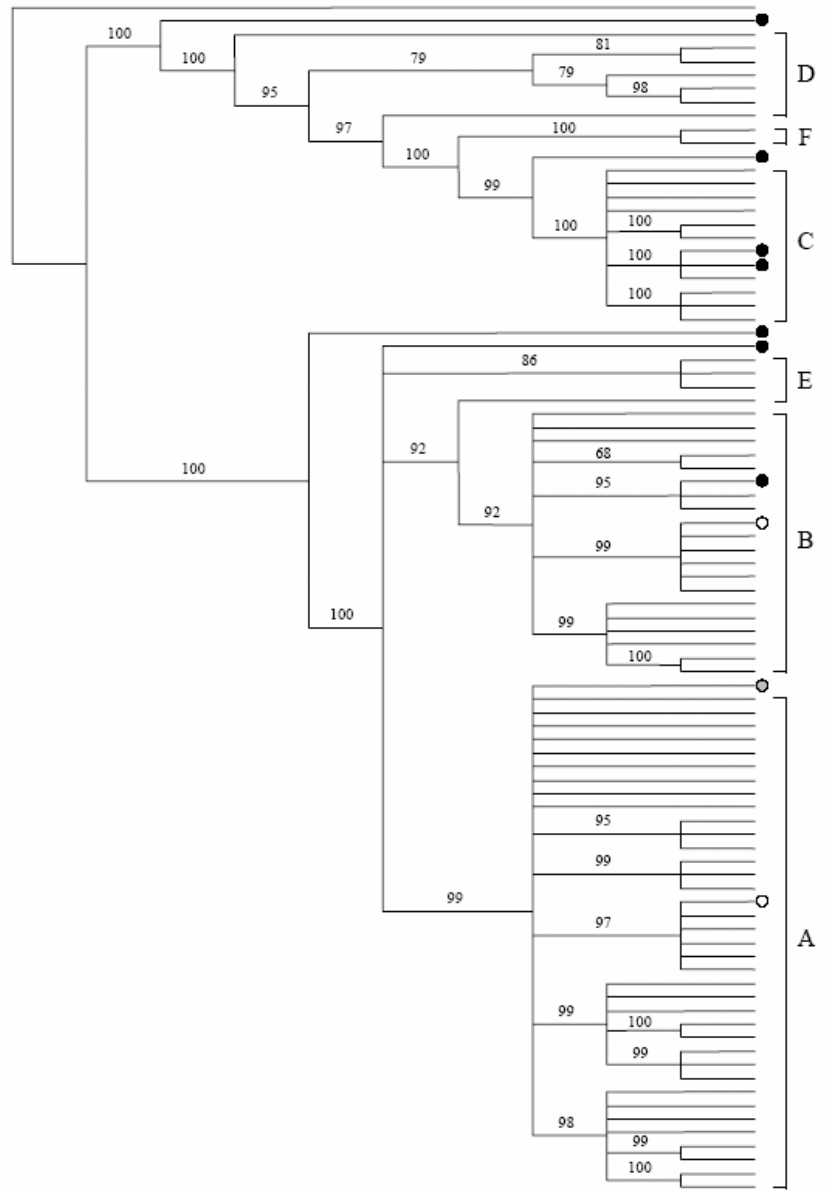

Supplement: 1471-2148-6-73-S1.pdf [file 1471-2148-6-73-S1.pdf]
